# Supplementary material
Source: PubMed Central journal article supplement (PMC4434721)
Supplement: pnas.201500458SI.pdf [file pnas.201500458SI.pdf]

# Supporting Information

Han et al. 10.1073/pnas.1500458112

## SI Materials and Methods

**Plasmid Engineering.** For the cRNA expression constructs, iGluR coding sequences were PCR-amplified from full-length cDNAs as follows: GluRIIA residues L24-S907 from RE27895, GluRIIB residues N19-K913 from the published cDNA clone (1), GluRIIC residues Q48-V965 from GH22844, GluRIID residues F20-D902 from RE24732, and GluRIIE residues Q23-Q897 from RE07945. The iGluR sequences were placed by QuikChange mutagenesis between the Tolloid-related signal peptide MRRRRGTPLGVS-WTNCVLLLATGLLVVLISVHA (2) and an RGSH<sub>6</sub> C-terminal tag, cloned into the pSP64 expression vector. For chemiluminescence assays, an HA-tag was added (by PCR and QuikChange mutagenesis) to each of the iGluR subunits in between the signal peptide and the N-terminal domain. For the Neto  $\beta$  cRNA expression, the full-length coding sequence from RE42119 was cloned into pSP64.

The pSP64-based constructs were linearized with XbaI, and the cRNA synthesized using SP6 polymerase (Ambion, mMessage mMachine transcription kit). Defolliculated stage 5–6 *Xenopus* oocytes obtained from Ecocyte Bioscience were injected with between 0.5 ng to 10 ng of cRNA as indicated, and incubated at 18 °C for 2–4 d in ND96 (96 mM NaCl, 2 mM KCl, 1.8 mM CaCl<sub>2</sub>, 1 mM MgCl<sub>2</sub>, 5 mM Hepes, 2.5 mM sodium pyruvate, gentamycin at 50  $\mu$ g/mL, pH 7.6).

**Immunohistochemistry and Surface Labeling.** Three days after injection with 2 ng of each cRNA, oocytes were fixed overnight at 4 °C in PBS containing 4% (vol/vol) formaldehyde (Polysciences) and 15% (vol/vol) picric acid (Electron Microscopy Sciences); uninjected control oocytes from the same batch were processed identically. Fixed oocytes were washed in PBS with 0.5% Triton X-100 over 8 h, then incubated overnight with primary antibodies at 4 °C in PBS with 0.5% Triton X-100. Primary antibodies were used at the following dilutions: mouse anti-RGSH<sub>6</sub> (Qiagen), 1:100; rat anti-HA (3F10, Roche), 1:100; rat anti-Neto-ex, 1:200 (3). Alexa Fluor 488- and Alexa Fluor 568-conjugated secondary antibodies (Molecular Probes; 1:200) were incubated for 1 h at room temperature or overnight at 4 °C. The oocytes were next cryoprotected by overnight immersion in PBS with 30% (wt/vol) sucrose and embedded in media for frozen sectioning (Fischer Scientific). Next, 20- $\mu$ m sections were cut on a freezing microtome and were mounted in ProLong Gold (Invitrogen). Sections from oocytes injected with different cRNAs or uninjected controls were imaged under identical confocal settings in the same imaging session with a laser scanning confocal microscope (CarlZeiss LSM780).

The level of cell surface HA-tagged iGluRs was measured by chemiluminescence as previously described (4). Briefly, 3 d after injection, oocytes were blocked for 30 min with 1% BSA in ND96 solution, then incubated for 1 h with 0.25  $\mu$ g/mL rat anti-HA antibody (3F10, Roche), washed with ND96 containing 1% BSA, followed by 1 h incubation with horseradish peroxidase-conjugated secondary antibody (1:400; Jackson Laboratories). All incubations and washes were performed at 4 °C. Individual oocytes were placed into a mixture of 70  $\mu$ L ND96 and 30  $\mu$ L of SuperSignal ELISA Femto maximum sensitivity substrate (Pierce) and incubated for 1 min. The chemiluminescence signal was in-

tegrated for 2 s and quantified using a Monolight 3010 Lumi-nometer (BD Biosciences).

**Electrophysiology.** Two-electrode voltage-clamp recordings at a holding potential of  $-60$  mV, with 3M KCl agarose-tipped electrodes of resistance 0.1–0.8 M $\Omega$  were performed as described previously (5), 2–3 d after injection of cRNAs, typically 1 ng of each subunit with 1 ng Neto  $\beta$ . The bath solution contained 100 mM NaCl, 1 mM KCl, 5 mM Hepes pH 7.5, to which BaCl<sub>2</sub>, CaCl<sub>2</sub> and MgCl<sub>2</sub> were added as required. Con A (Sigma Type IV), 0.6 mg/mL dissolved in recording solution and 0.2- $\mu$ m filtered was applied for 4 min after oocytes were impaled to block desensitization. Amino acid ligands and NASPM purchased from Tocris Bioscience were dissolved in recording solution and applied by computer operated solenoid valves. ATX was a gift from Koji Nakanishi, Columbia University, New York, NY.

**Protein Expression.** The GluRIIB LBD S1S2 construct, residues D416-K537 and D660-D802, connected by a GT dipeptide linker with an N-terminal MH<sub>6</sub>LVPRGS affinity purification tag and thrombin cleavage site, was created by overlap PCR from the full-length cDNA and cloned into the pET22 expression vector used previously for expression of other iGluR S1S2 constructs (6). Protein was expressed in origami B(DE3) cells induced overnight with 30  $\mu$ M isopropyl- $\beta$ -D-thiogalactopyranoside at 18 °C; final yields following immobilized metal-ion affinity chromatography and anion-exchange chromatography, with thrombin cleavage used to remove the affinity tag, were typically 1.6 mg/L. Similar constructs were also prepared for GluRIIA, GluRIIC, GluRIID, and GluRIIE, but only GluRIIA gave soluble protein, and attempts to obtain diffraction quality crystals have not been successful.

**Crystallography.** Crystals were grown at 20 °C by repeated rounds of microseeding from a protein stock of concentration 5.5 mg/mL in a buffer of composition 150 mM NaCl, 10 mM Tris pH 8.0, 1 mM EDTA, and 2 mM L-glutamate, with a reservoir containing 18% PEG MME 2K, 0.1 M Tris, pH 8.0, 5 mM NiCl<sub>2</sub>. X-ray diffraction data were collected at beam line ID22 at the Advanced Photon Source using a MAR 300 mosaic CCD detector (Table S1) and processed using HKL2000 (7). Using the GluK2 LBD glutamate complex PDB ID code 1S50 as a probe, a solution with two molecules in the asymmetric unit, with a strong NCS peak, was obtained by molecular replacement using PHASER (8), RFZ = 6.5, TFZ = 11.9 + TNCS, LLG = 354, NCS translation vector = 0.490 0.455 0.497. An  $R_{\text{free}}$  set was picked using thin shells and the structure refined using PHENIX (9) with manual rebuilding using COOT (10). The final model was refined to an  $R_{\text{free}}$  value of 22.9% with good geometry at a resolution of 2.0 Å (Table S1). There was unambiguous electron density for ligand binding site residues, the bound glutamate molecule and three trapped water molecules in both chains; there was no electron density for residues 416–425, 442–445, and 797–802, in the N terminus, loop 1, and C terminus, respectively. Analysis of the ligand binding site volume was performed using VOIDOO (11) as described previously (6).

1. Petersen SA, Fetter RD, Noordermeer JN, Goodman CS, DiAntonio A (1997) Genetic analysis of glutamate receptors in *Drosophila* reveals a retrograde signal regulating presynaptic transmitter release. *Neuron* 19(6):1237–1248.
2. Serpe M, O'Connor MB (2006) The metalloprotease tolloid-related and its TGF-beta-like substrate Dawdle regulate *Drosophila* motoneuron axon guidance. *Development* 133(24):4969–4979.

3. Kim YJ, Bao H, Bonanno L, Zhang B, Serpe M (2012) *Drosophila* Neto is essential for clustering glutamate receptors at the neuromuscular junction. *Genes Dev* 26(9):974–987.
4. Zhang W, et al. (2009) A transmembrane accessory subunit that modulates kainate-type glutamate receptors. *Neuron* 61(3):385–396.

5. Panchenko VA, Glasser CR, Partin KM, Mayer ML (1999) Amino acid substitutions in the pore of rat glutamate receptors at sites influencing block by polyamines. *J Physiol* 520(Pt 2):337–357.
6. Mayer ML (2005) Crystal structures of the GluR5 and GluR6 ligand binding cores: Molecular mechanisms underlying kainate receptor selectivity. *Neuron* 45(4):539–552.
7. Otwinowski Z, Minor W (1997) Processing of X-ray diffraction data collected in oscillation mode. *Methods Enzymol* 276:307–344.
8. McCoy AJ, et al. (2007) Phaser crystallographic software. *J Appl Cryst* 40(Pt 4):658–674.

9. Adams PD, et al. (2010) PHENIX: a comprehensive Python-based system for macromolecular structure solution. *Acta Crystallogr D Biol Crystallogr* 66(Pt 2):213–221.
10. Emsley P, Lohkamp B, Scott WG, Cowtan K (2010) Features and development of Coot. *Acta Crystallogr D Biol Crystallogr* 66(Pt 4):486–501.
11. Kleywegt GJ, Jones TA (1994) Detection, delineation, measurement and display of cavities in macromolecular structures. *Acta Crystallogr D Biol Crystallogr* 50(Pt 2): 178–185.

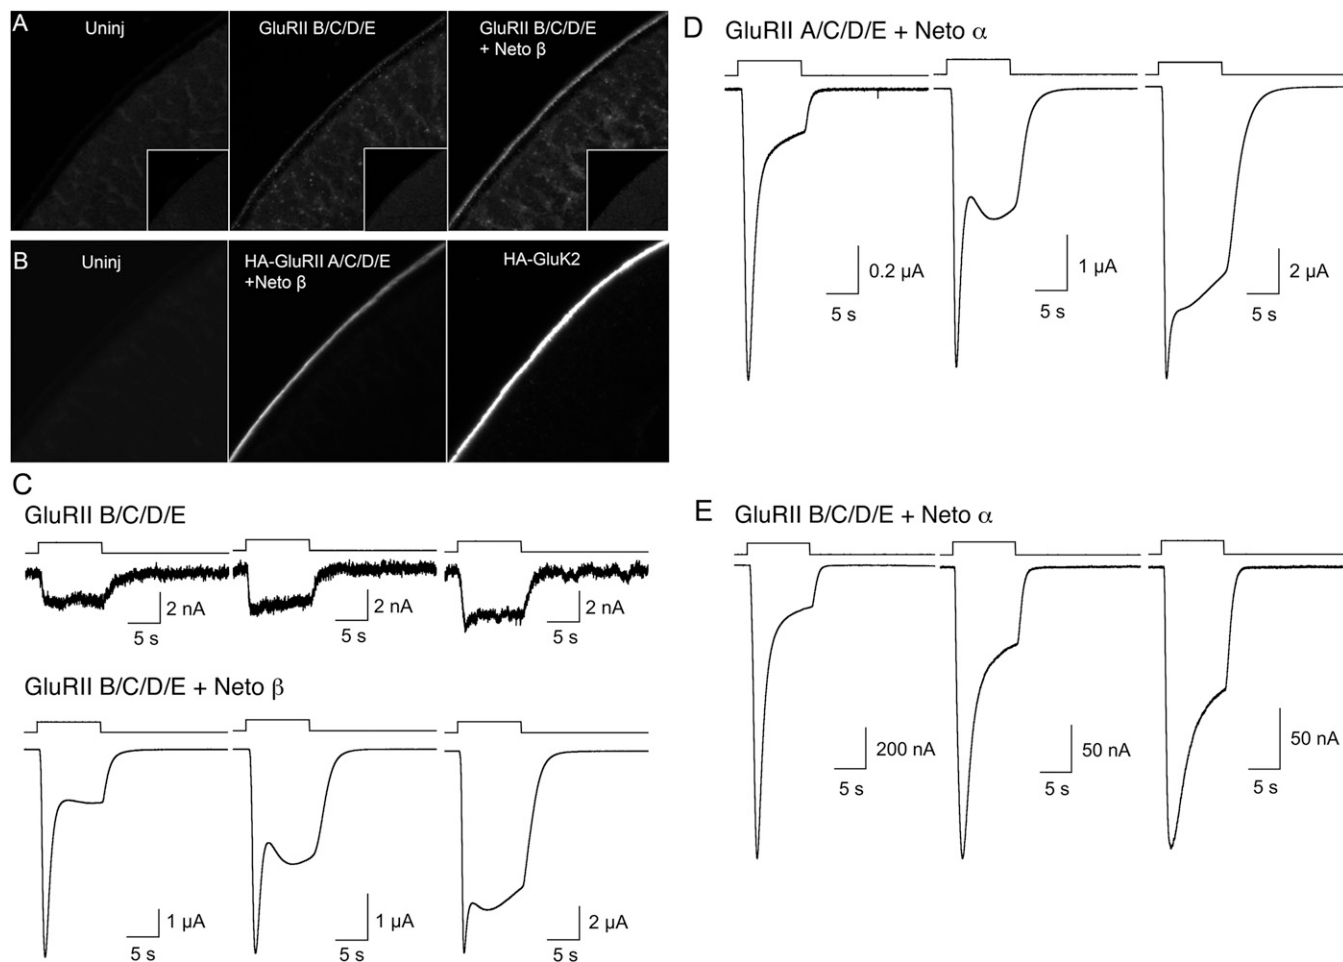

**Fig. S1.** (A) Confocal images of oocytes injected as indicated with cRNA for RGSH<sub>6</sub>-tagged GluRII B/C/D/E with or without Neto  $\beta$ , and immunolabeled for anti-RGSH<sub>6</sub>; the box size for each image is 170  $\times$  170  $\mu$ m. Surface receptors were detected at the animal but not vegetal pole (*insets*) and were increased by co-expression of Neto  $\beta$ . (B) Confocal images of oocytes injected as indicated with cRNA for HA-tagged GluRIIA/C/D/E plus Neto  $\beta$  or HA-GluK2 and immunolabeled for anti-HA; the box size for each image is 170  $\times$  170  $\mu$ m. (C) Small-amplitude responses to 3 mM glutamate at  $-60$  mV for three representative oocytes injected with cRNA for GluRII B/C/D/E (*Upper*) and large amplitude responses to 3 mM glutamate at  $-60$  mV (*Lower*) for representative oocytes injected with cRNA for GluRII B/C/D/E with Neto  $\beta$ , illustrating variability in transient inward current responses. Responses in (C) were recorded on the same day from the same batch of oocytes. (D) Responses to 3 mM glutamate at  $-60$  mV for three representative oocytes injected with cRNA for GluRIIA/C/D/E and Neto  $\alpha$ . (E) Responses to 3 mM glutamate at  $-60$  mV for three representative oocytes injected with cRNA for GluRII B/C/D/E and Neto  $\alpha$ . Responses in (D and E) were recorded on the same day from the same batch of oocytes.

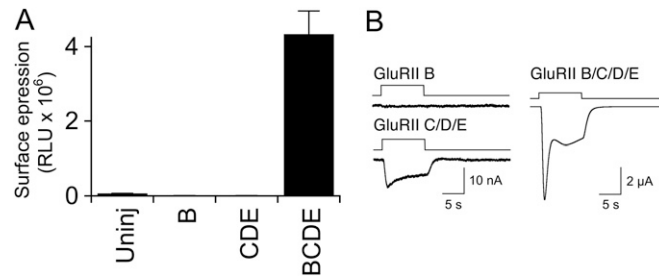

**Fig. S2.** Subunit dependence of *Drosophila* NMJ glutamate receptor cell surface expression and function. (A) Cell surface expression measured by chemiluminescence for different combinations of HA-tagged GluRII subunits; error bars show SEM. (B) Responses to 3 mM glutamate at  $-60$  mV for representative oocytes injected with cRNA for GluRIIB, GluRIIC/D/E, and GluRIIB/C/D/E, all recorded on the same day.

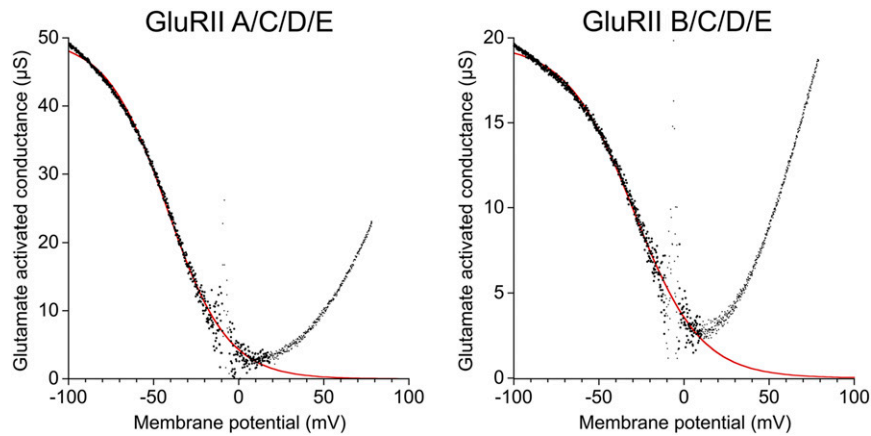

**Fig. S3.** Typical conductance-voltage plots for GluRIIA/C/D/E and GluRIIB/C/D/E reveal different voltage-dependence for block by cytoplasmic polyamines of GluRIIA- versus GluRIIB-containing receptors; red lines show fits over the range  $-100$  to  $+20$  mV of a Boltzmann function of the form

$$G = G_{\max} / [1 + \exp((V_m - V_b)/k_b)],$$

where  $G$  is the conductance at membrane potential  $V_m$ ;  $V_b$  is the potential for half block; and  $k_b$  the slope factor. Values for  $V_b$  and  $k_b$  were  $-44.8 \pm 0.9$  mV and  $17.6 \pm 0.3$  ( $n = 9$ ) for GluRIIA/C/D/E and  $-31.9 \pm 1.3$  mV and  $18.7 \pm 0.8$  ( $n = 10$ ) for GluRIIB/C/D/E, respectively. The conductance ratio at  $+80/-80$  mV was  $44 \pm 3\%$  for GluRIIA versus  $92 \pm 10\%$  for GluRIIB. At the membrane potential for maximum block ( $V_{\min}$ ) the conductance ratio relative to that at  $-80$  mV was  $3.3 \pm 0.9\%$  for GluRIIA and  $9.5 \pm 2.9\%$  for GluRIIB, with little difference in the values for  $V_{\min}$ ,  $12.4 \pm 0.4$  mV and  $13.7 \pm 0.8$  mV, respectively.

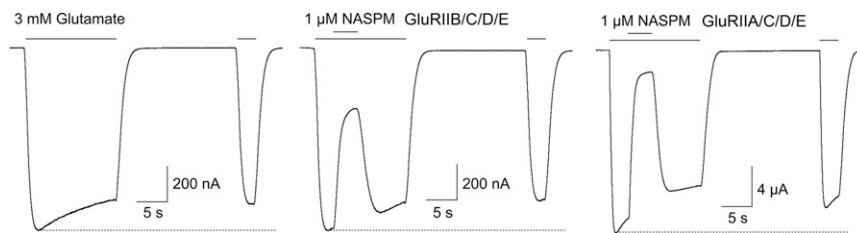

**Fig. S4.** Correction for rundown for measurement of block by NASPM. (Left) Time-dependent rundown for GluRIIB/C/D/E evoked by a 15-s application of 3 mM glutamate, a 20-s pause in control solution, and then a 3-s application of 3 mM glutamate. (Center) Recorded from the same oocyte, using the same protocol for application of glutamate, but with a 4-s coapplication of 1 μM NASPM, 3 s after the start of the first application of glutamate. (Right) The kinetics of block by 1 μM NASPM for GluRIIA/C/D/E. Measurement of the extent and recovery from block by NASPM was corrected for the rundown measured at the same time points for the control response. The recording for GluRIIB/C/D/E is from the same oocyte illustrating stronger block by 200 nM ATX shown in Fig. 3G.



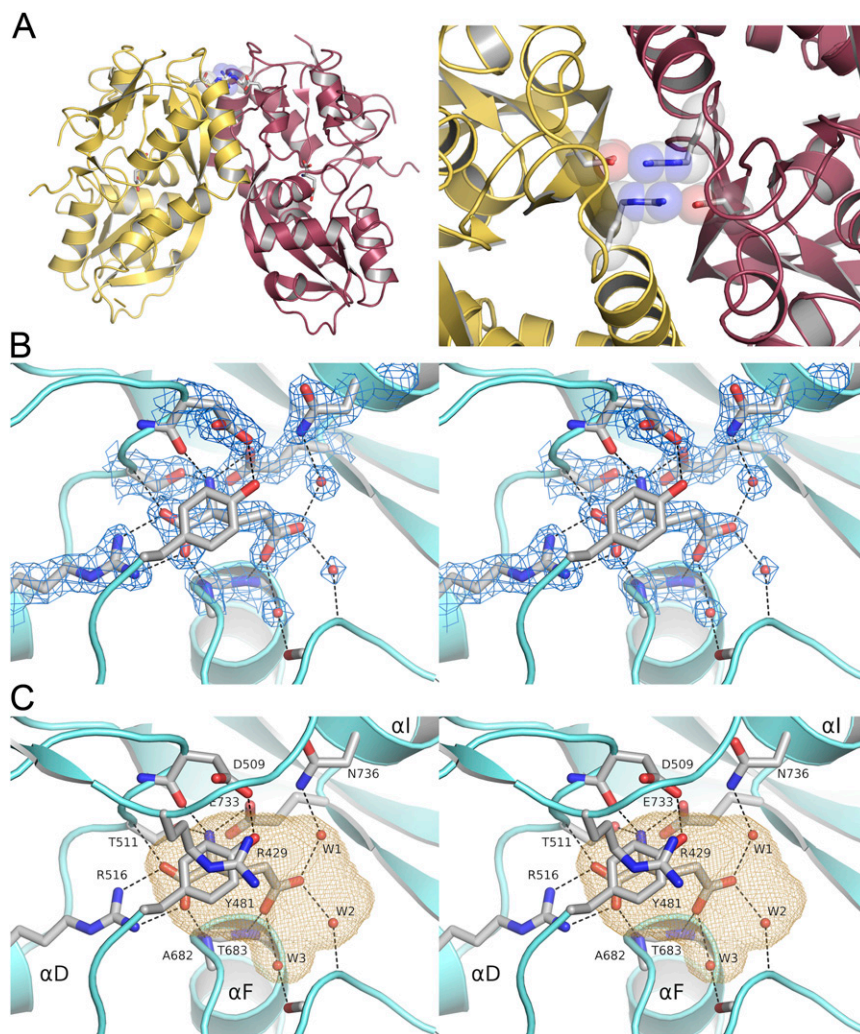

**Fig. S6.** Crystal structure of the GluRIIB ligand binding domain. (A) Side (*Left*) and an expanded top view (*Right*) of the LBD dimer assembly with the two subunits colored gold and magenta, respectively. The side chains for Asp521 and Arg770 are drawn in stick representation, with transparent CPK spheres to highlight an unusual intermolecular stacking of the side-chain guanidinium groups. (B) Stereoview of representative electron density for a  $2mF_o - dF_c$  map contoured at  $2\sigma$  showing the glutamate ligand, trapped water molecules and binding-site side chains. (C) Stereoview showing capping of the GluRIIB ligand binding site by Arg429, Asp509, and Tyr481, with the cavity containing the ligand and trapped water molecules drawn as an orange mesh.





**Table S1. Data collection and refinement statistics**

| Data collection and refinement                      | Statistics                                    |
|-----------------------------------------------------|-----------------------------------------------|
| Data collection                                     |                                               |
| Space group                                         | P2 <sub>1</sub> 2 <sub>1</sub> 2 <sub>1</sub> |
| Unit cell <i>a</i> , <i>b</i> , <i>c</i> (Å)        | 52.3, 94.5, 119.5                             |
| $\alpha = \gamma = \beta$                           | 90                                            |
| Number per AU                                       | 2                                             |
| Wavelength (Å)                                      | 1.000                                         |
| Resolution (Å)*                                     | 30.0–2.0 (2.03)                               |
| Unique observations                                 | 40,664                                        |
| Mean redundancy <sup>†</sup>                        | 6.5 (6.3)                                     |
| Completeness (%) <sup>†</sup>                       | 99.9 (99.5)                                   |
| $R_{\text{merge}}^{\dagger\dagger}$                 | 0.069 (0.84)                                  |
| $R_{\text{pim}}^{\dagger\dagger\dagger}$            | 0.029 (0.36)                                  |
| $I/\sigma(I)^{\dagger}$                             | 27.6 (2.26)                                   |
| Refinement                                          |                                               |
| Resolution (Å)                                      | 30.0–2.0 (2.03)                               |
| Protein atoms (AC) <sup>¶</sup>                     | 4,105 (11)                                    |
| Ligand atoms                                        | 20                                            |
| Water atoms                                         | 275                                           |
| $R_{\text{work}}/R_{\text{free}}$ (%) <sup>  </sup> | 20.0/22.9                                     |
| <i>rms deviations</i>                               |                                               |
| Bond lengths (Å)                                    | 0.03                                          |
| Bond angles (°)                                     | 0.65                                          |
| Mean B values (Å <sup>2</sup> )                     |                                               |
| Protein overall                                     | 33.81                                         |
| Main chain/side chain                               | 29.6/37.9                                     |
| Ligand                                              | 18.6                                          |
| Water                                               | 34.3                                          |
| <i>Ramachandran</i> % <sup>**</sup>                 | 97.8/0.4                                      |
| PDB ID code                                         | 4WXJ                                          |

\*Values in parenthesis indicate the low resolution limit for the highest-resolution shell of data.

<sup>†</sup>Values in parenthesis indicate statistics for the highest-resolution shell of data.

<sup>††</sup> $R_{\text{merge}} = (\sum |I_i - \langle I_i \rangle|) / \sum I_i$ , where  $\langle I_i \rangle$  is the mean  $I_i$  over symmetry-equivalent reflections.

<sup>†††</sup> $R_{\text{pim}} = (\sqrt{1/(n-1)} \sum_{i=1}^n |I_i|) / \sum I_i$ , where  $\langle I_i \rangle$  is the mean  $I_i$  over symmetry-equivalent reflections.

<sup>¶</sup>Alternate conformations.

<sup>||</sup> $R_{\text{work}} = (\sum ||F_o| - |F_c||) / \sum |F_o|$ , where  $F_o$  and  $F_c$  denote observed and calculated structure factors, respectively; 5% of the reflections were set aside for the calculation of the  $R_{\text{free}}$  value.

<sup>\*\*</sup>Preferred/disallowed conformations.
